# Supplementary material for: Interactions of PLA2-s from Vipera lebetina, Vipera berus berus and Naja naja oxiana Venom with Platelets, Bacterial and Cancer Cells
Source: PubMed Central journal article supplement (PMC3640532; doi:10.3390/toxins5020203), 2013-01-24
Supplement: toxins-05-00203-s001.pdf [file toxins-05-00203-s001.pdf]

## Supplementary Information

**Figure S1.** MALDI-TOF analysis of tryptic peptides derived from NNOPLA<sub>2</sub>. The molecular masses and sequence fragments are marked in the figure.

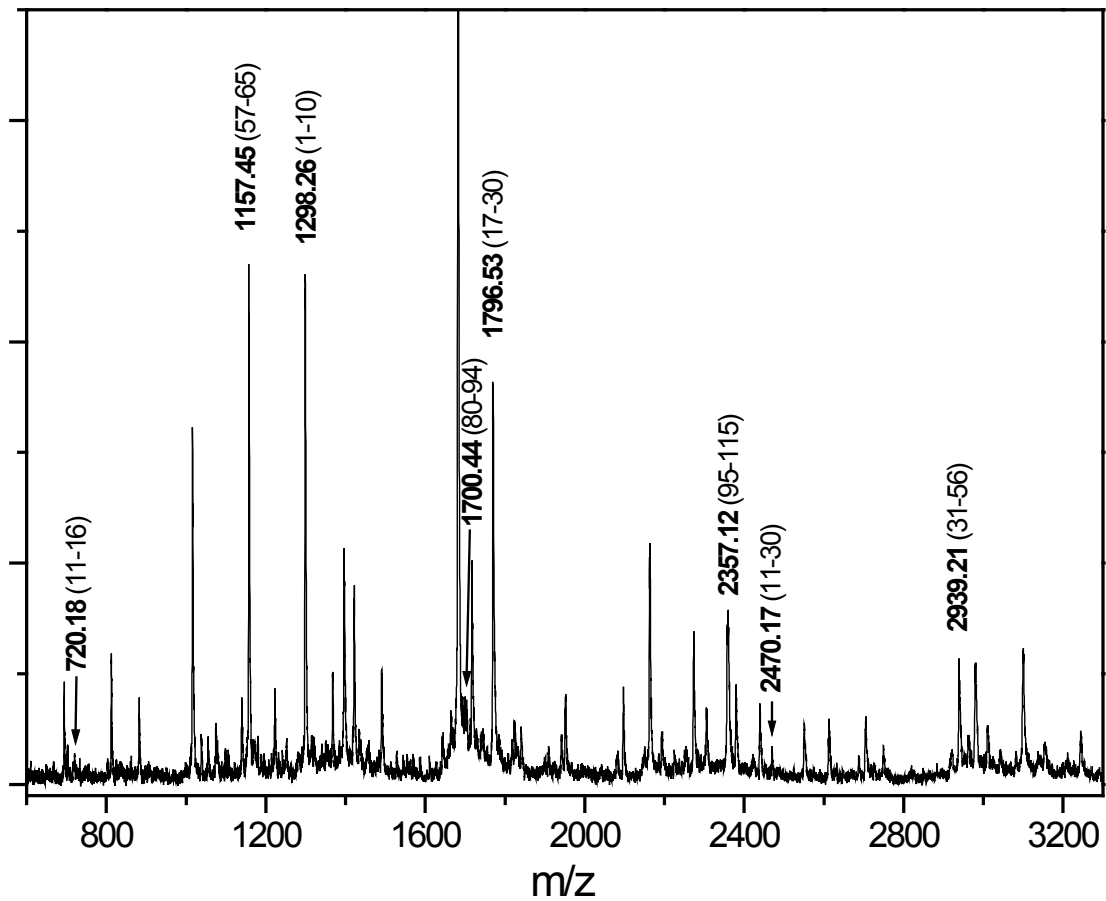

© 2013 by the authors; licensee MDPI, Basel, Switzerland. This article is an open access article distributed under the terms and conditions of the Creative Commons Attribution license (<http://creativecommons.org/licenses/by/3.0/>).
